# Supplementary material for: RNA-seq Reveals Dysregulation of Novel Melanocyte Genes upon Oxidative Stress: Implications in Vitiligo Pathogenesis
Source: Hindawi journal article supplement (doi:10.1155/2019/2841814), 2019-12-04
Supplement: f1 [file 2841814.f1.pdf]

Supplementary Figure-1

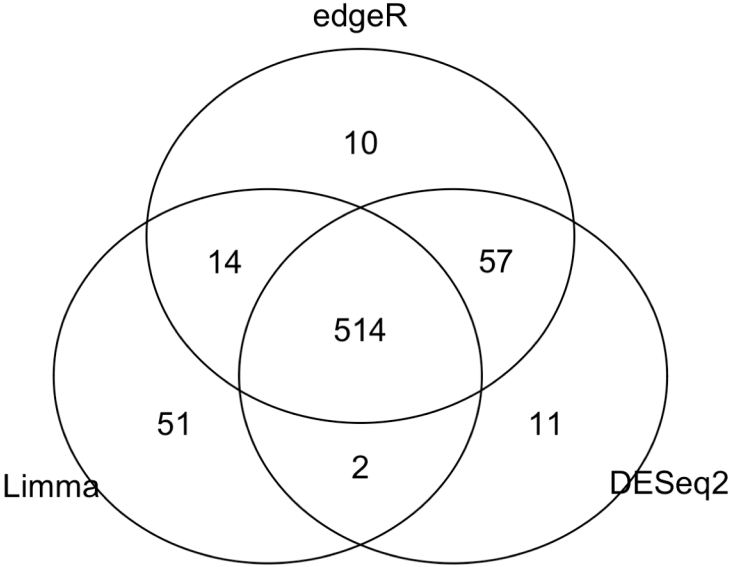

## A

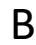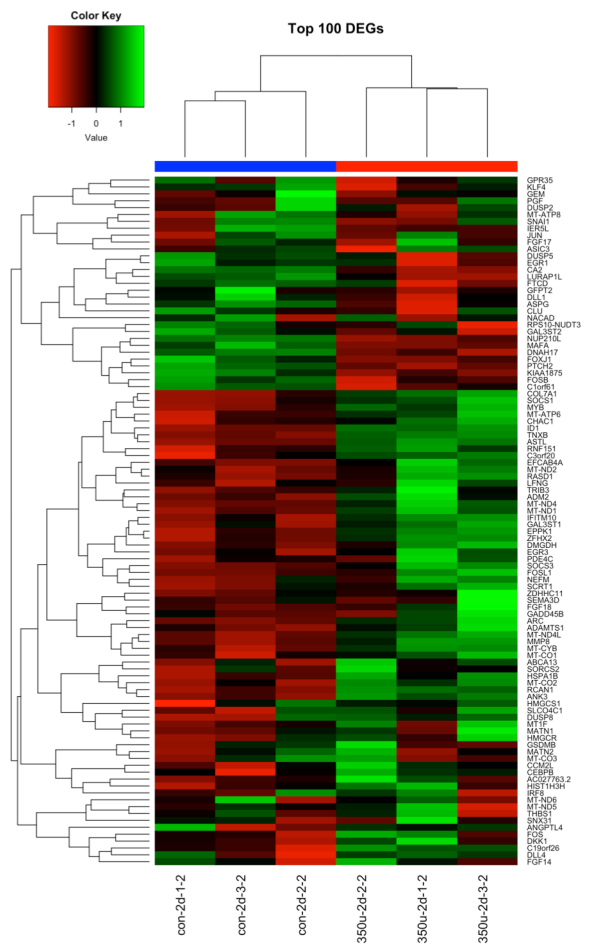

# Supplementary Figure-3

Con vs 100  $\mu$ M- 48 h

## Molecular Function

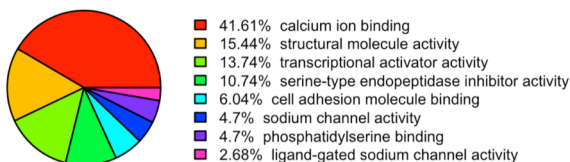

## Biological Process

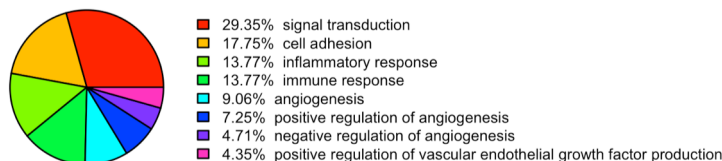

## Cellular Component

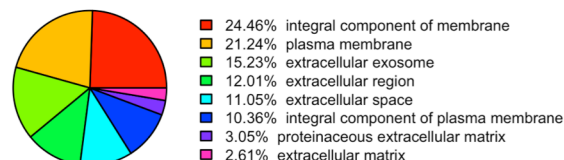

Con vs 350  $\mu$ M-48 h

## Molecular Function

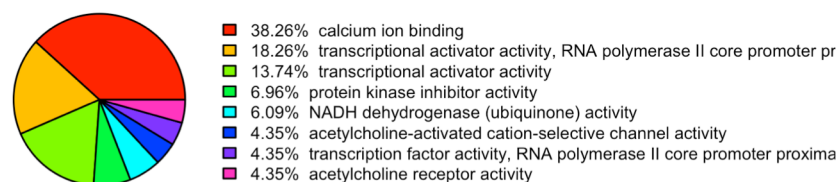

## Biological Process

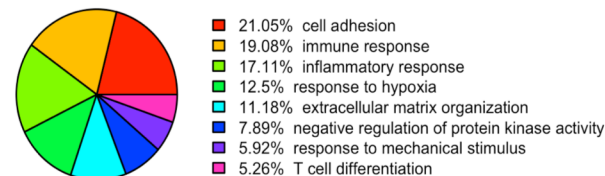

## Cellular Component

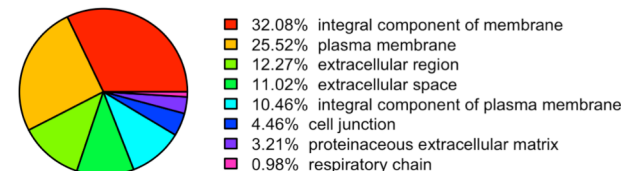

# Supplementary Figure-4

Con vs 100  $\mu$ M- 48 h

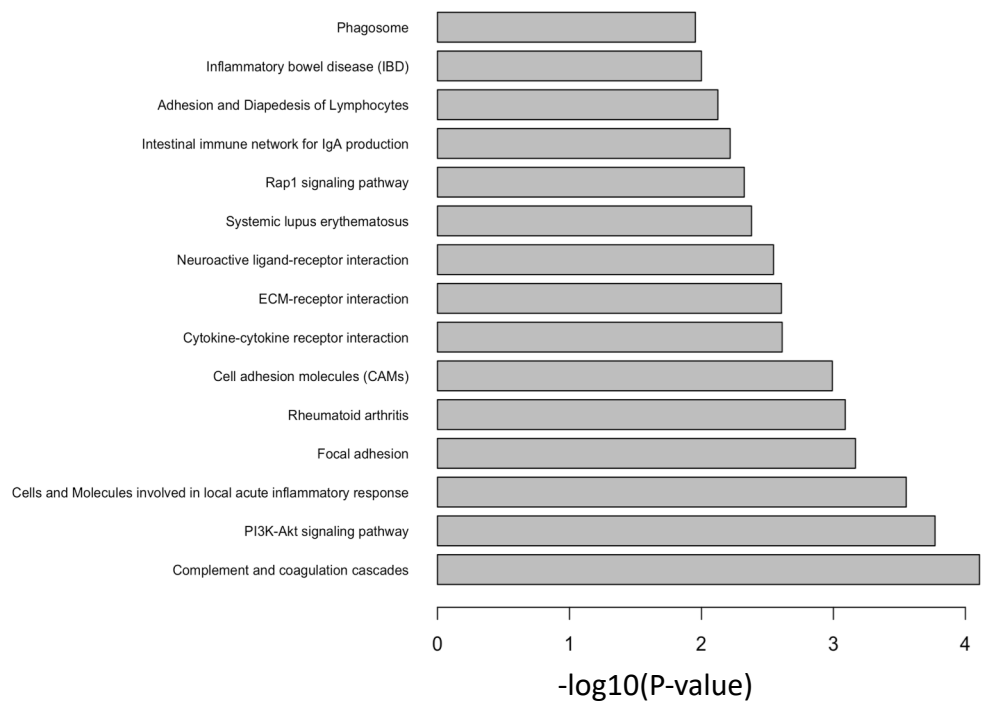

Con vs 350  $\mu$ M-48 h

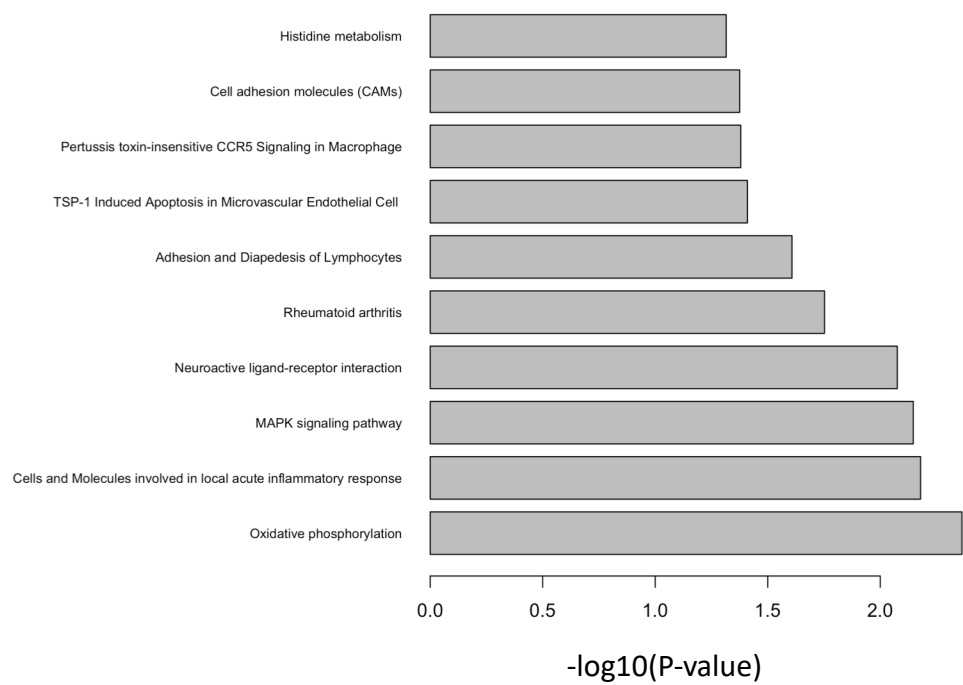

# Supplementary Figure-5

A

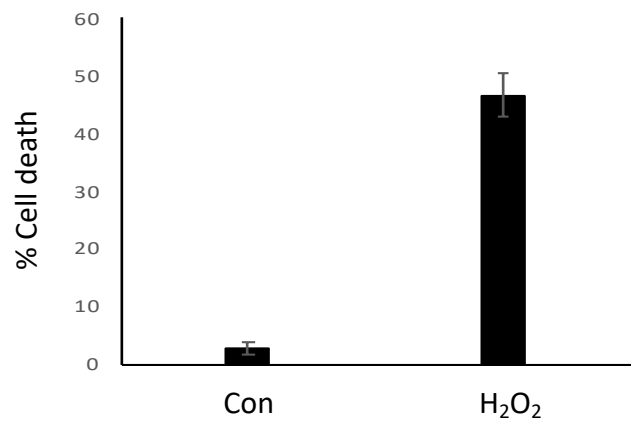

B

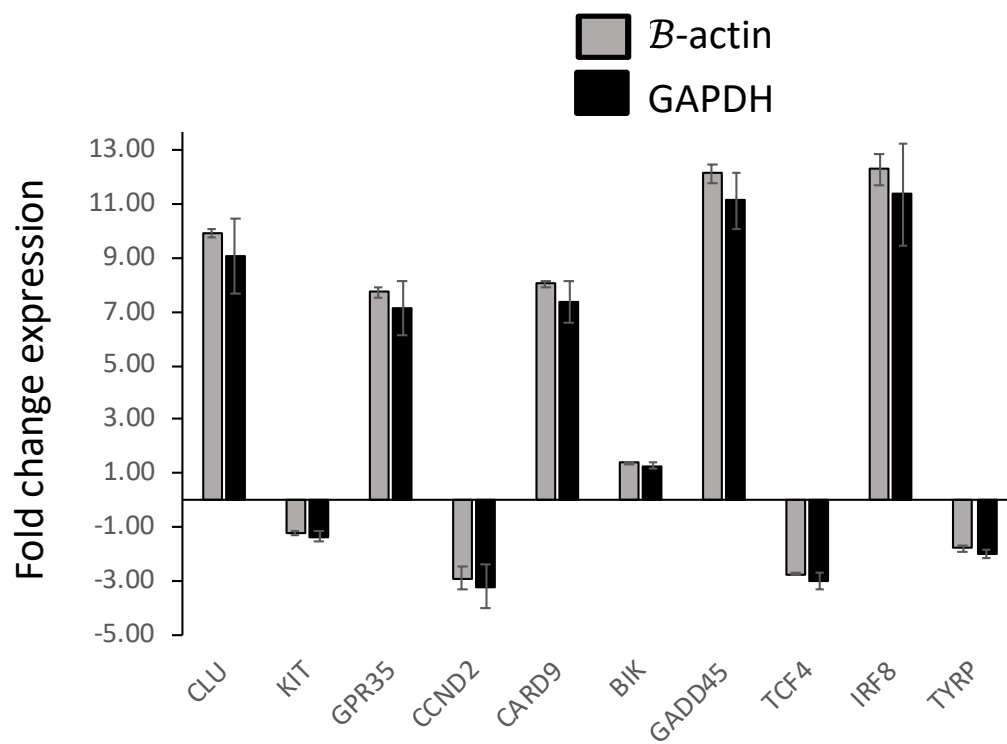

## **SUPPLEMENTARY INFORMATION:**

**Supplementary Figure-1:** Comparison of the DEGs detected by three methods: Venn diagram of DEGs detected by the edgeR, DESeq and Limma.

**Supplementary Figure-2:** The hierarchical clustering of top 100 differentially expressed genes (A): Control vs 100  $\mu\text{M}$   $\text{H}_2\text{O}_2$  (B): Control vs 350  $\mu\text{M}$   $\text{H}_2\text{O}_2$  at 48 h treatment and control. Red color is the upregulated and Green color is the downregulated genes.

**Supplementary Figure-3:** GO enrichment analysis of DEGs (A): 100  $\mu\text{M}$   $\text{H}_2\text{O}_2$  and control samples at 48 h; (B): 350  $\mu\text{M}$   $\text{H}_2\text{O}_2$  and control samples at 48 h, according to DAVID Bioinformatics tool.

**Supplementary Figure-4:** Biological pathway enrichment analysis of DEGs (A): 100  $\mu\text{M}$   $\text{H}_2\text{O}_2$  and control for 48 h; (B): 350  $\mu\text{M}$   $\text{H}_2\text{O}_2$  and control for 48 h using DAVID bioinformatics tool.

**Supplementary Figure-5:** PIG1 cells were treated with 250  $\mu\text{M}$   $\text{H}_2\text{O}_2$  for 48 h and cell viability was measured by trypan blue dye exclusion assay (A). Relative gene expression of indicated genes was measured using quantitative RT-PCR (B). GAPDH and beta-actin were used as internal controls separately.

**Supplementary Table-1:** List of differentially regulated selected apoptotic proteins after 24 h of treatment with H<sub>2</sub>O<sub>2</sub>

| Putative Function | Genes       | Log2 Fold Change |
|-------------------|-------------|------------------|
| Apoptosis         | TNFRSF9     | +3.4             |
|                   | TNFRSF8     | +3.8             |
|                   | TNFRSF1B    | +1.5             |
|                   | TNFRSF10A   | +1.2             |
|                   | TNFRSF11B   | +2.5             |
|                   | TNFRSF12A   | +3.2             |
|                   | TNFRSF13C   | +1.2             |
|                   | CARD9       | +2.6             |
|                   | CARD11      | +3.1             |
|                   | NALP3/NLRP3 | +5.0             |
